# Supplementary material
Source: publisher figshare collection journal article supplement (https://acs.figshare.com/ndownloader/files/21851031)
Supplement: Supplementary file 1 [file 21851031]

## Supporting information

### Inkjet printable polydimethylsiloxane for all-inkjet printed multilayered, soft electrical applications

*†Riikka Mikkonen\*, †Paula Puistola, ‡Ilari Jönkkäri, †Matti Mäntysalo.*

†Unit of Electrical Engineering, Faculty of Information Technology and Communication Sciences, Tampere University, Korkeakoulunkatu 7, 33720 Tampere, Finland.

‡Unit of Materials Science and Environmental Engineering, Faculty of Engineering and Natural Sciences, Tampere University, Korkeakoulunkatu 6, 33720 Tampere, Finland.

Corresponding author:

\*E-mail: riikka.mikkonen@tuni.fi

The jettability of the inkjet inks can be estimated with an inverse of the Ohnesorge number,  $Z$ , which is a result of fluid properties (viscosity  $\eta$ , surface tension  $\gamma$ , density  $\rho$ , and droplet diameter  $d$ ):

$$Z = \frac{(d\rho\gamma)^{1/2}}{\eta}. \quad (1)$$

Here, the droplet diameter was approximated to be the same as the nozzle diameter. The calculated  $Z$ -numbers of the PDMS inks are presented in table S1 together with the fluid characteristics of each ink.

**Table S1.** Fluid properties of each PDMS ink, and the calculated Z-numbers.

| Ink               | Measured<br>Viscosity<br>(mPa·s) | Measured<br>surface<br>tension<br>(mN/m) <sup>1</sup> | Calculated<br>density<br>(g/ml) | Nozzle<br>diameter<br>(μm) | Z-number |
|-------------------|----------------------------------|-------------------------------------------------------|---------------------------------|----------------------------|----------|
| PDMS-IBA 1:2      | 9.3                              | 19.4±0.4                                              | 0.93                            | 21                         | 2.1      |
| PDMS-IBA-OA 1:1:1 | 12.3                             | 19.3±0.2                                              | 0.93                            | 21                         | 1.6      |
| PDMS-OA 1:2       | 16.9                             | 21.7±0.3                                              | 0.93                            | 21                         | 1.2      |

|             |      |          |      |    |     |
|-------------|------|----------|------|----|-----|
| PDMS-OA 1:3 | 13.7 | 21.8±0.1 | 0.92 | 21 | 1.5 |
| PDMS-OA 1:4 | 7.2  | 22.2±0.2 | 0.91 | 21 | 2.9 |

<sup>1</sup>Average ± standard deviation.
